# Supplementary material for: Structured Catalyst for Indirect Internal Reforming (IIR) of Biogas in Solid Oxide Fuel Cell (SOFC)
Source: MDPI journal article supplement (doi:10.3390/catal13071129), 2023-07-20
Supplement: s1 [file s1]

## Supplementary Materials

### Structured Catalyst for Indirect Internal Reforming (IIR) of Biogas in Solid Oxide Fuel Cell (SOFC)

Anna Prioriello <sup>1</sup>, Leonardo Duranti <sup>1,\*</sup>, Igor Luisetto <sup>2,\*</sup>, Frederick Sanna <sup>1</sup>, Claudio Larosa <sup>1,2</sup>, Maria Luisa Grilli <sup>2</sup> and Elisabetta Di Bartolomeo <sup>1</sup>

<sup>1</sup> Department of Chemical Science and Technology, University of Rome Tor Vergata, Via della Ricerca Scientifica 1, 00133 Rome, Italy

<sup>2</sup> Department of Energy Technologies, Italian National Agency for New Technologies, Energy and Sustainable Economic Development (ENEA) Casaccia Research Centre, Via Anguillarese 301, 00123 Rome, Italy

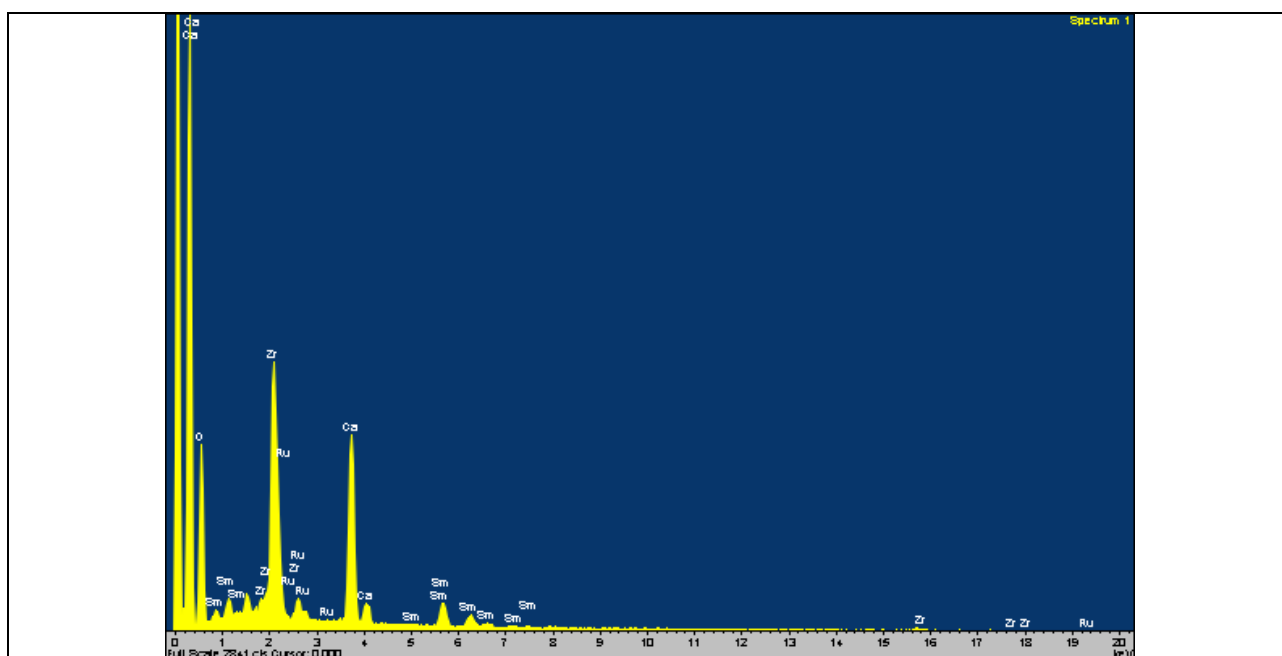

Figure S1: Representative EDX spectrum obtained on the reduced Ru<sub>3</sub>CZS sample. Elemental compositions (wt %) are reported in Table 1.

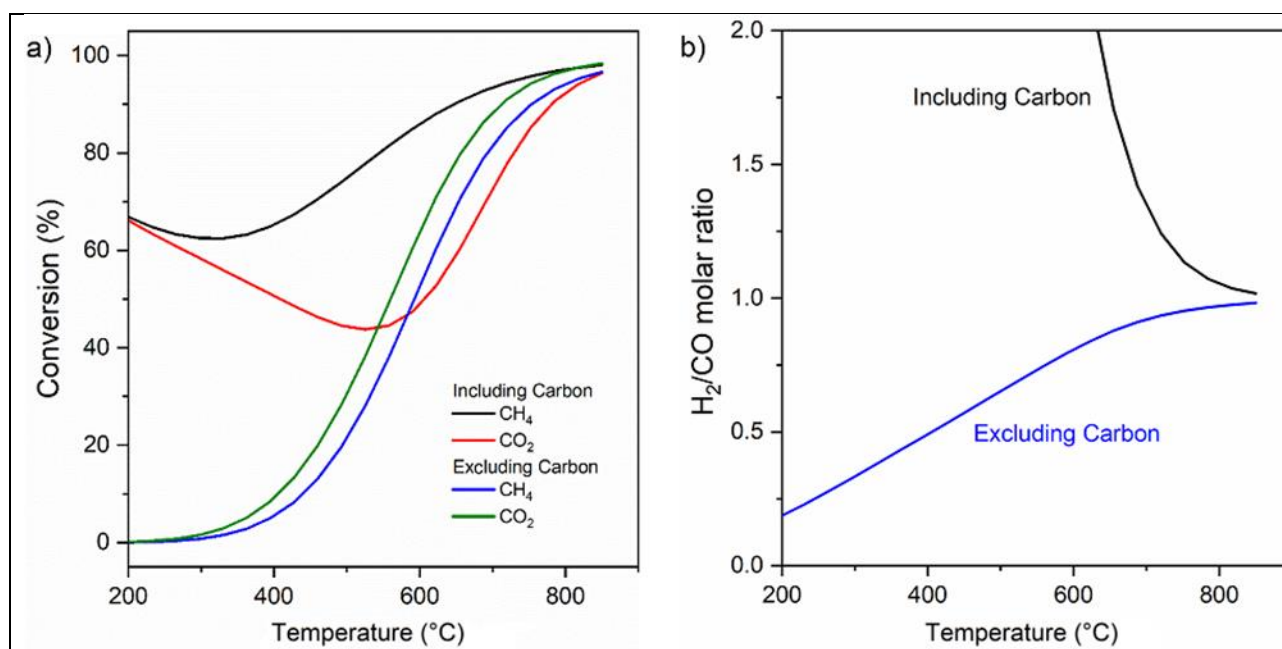

Figure S2: Curves of thermodynamic conversion of reactants (a) and H<sub>2</sub>/CO ratio (b) obtained by HSC chemistry with or without formation of C among the products.
